# Supplementary material for: Investigation of amino acid specificity in the CydX small protein shows sequence plasticity at the functional level
Source: PubMed Central journal article supplement (PMC6005532; doi:10.1371/journal.pone.0198699), 2018-06-18
Supplement: pone.0198699.s001.pdf [file pone.0198699.s001.pdf]

A

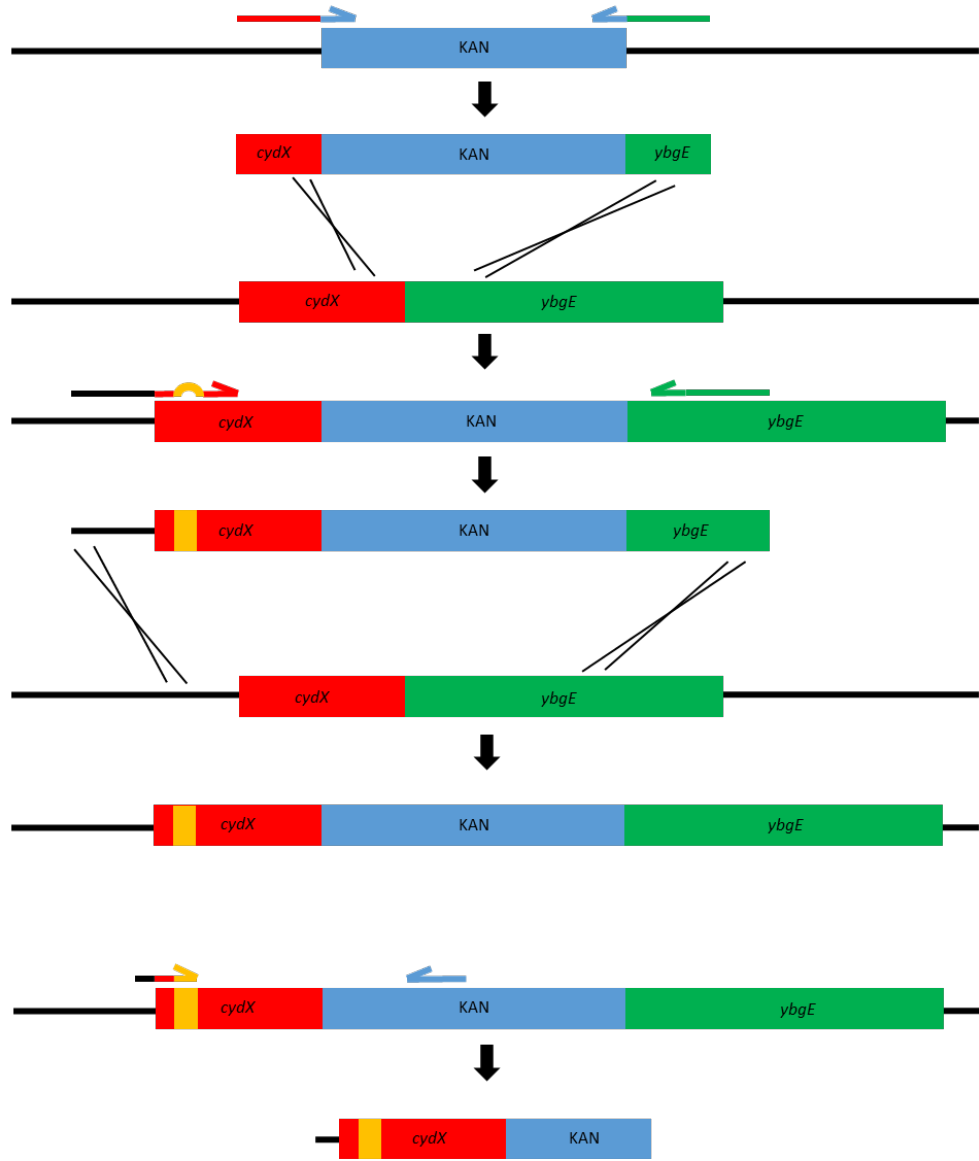

B

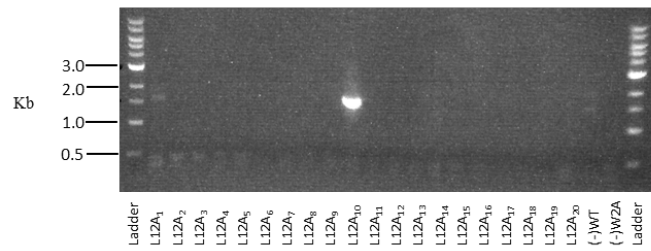

S1 Fig

Supplemental File 1. Construction of the *cydX* mutant alleles at the endogenous locus. (A) Diagram showing the mutant synthesis strategy as outlined in the Materials and Methods. (B) Example results from screening Kan(R) NM400 transformants for those where recombination had taken place outside of the desired mutation.
