# Supplementary material for: Investigation of amino acid specificity in the CydX small protein shows sequence plasticity at the functional level
Source: PubMed Central journal article supplement (PMC6005532; doi:10.1371/journal.pone.0198699), 2018-06-18
Supplement: pone.0198699.s002.pdf [file pone.0198699.s002.pdf]

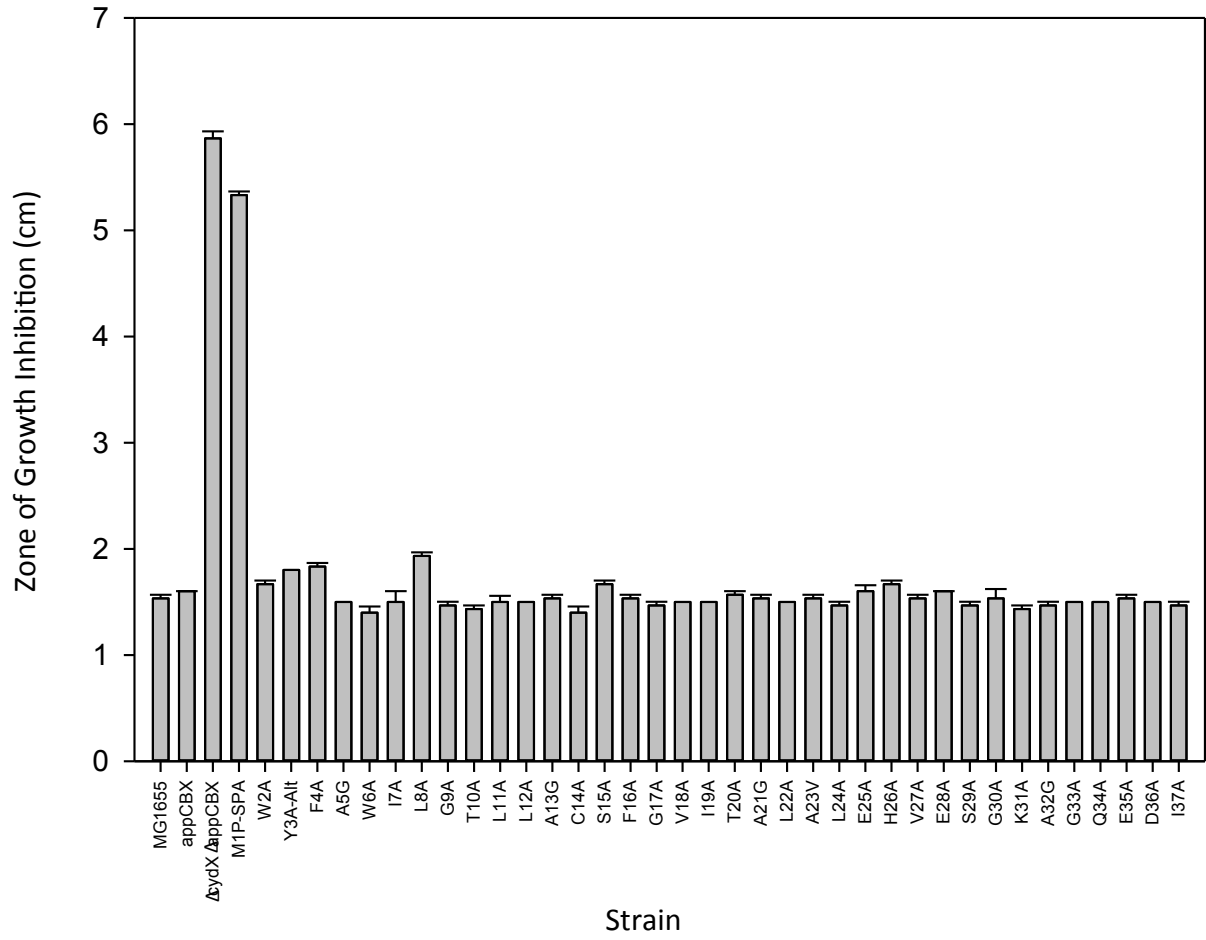

S2 Fig
